# Supplementary material for: The use of fluorescent protein-tagged carbohydrate-binding modules to evaluate the influence of drying on cellulose accessibility and enzymatic hydrolysis
Source: Royal Society of Chemistry journal article supplement (doi:10.1039/d0ra05333c), 2020-01-01
Supplement: d0ra05333c1.pdf [file d0ra05333c1.pdf]

Supplementary results

A

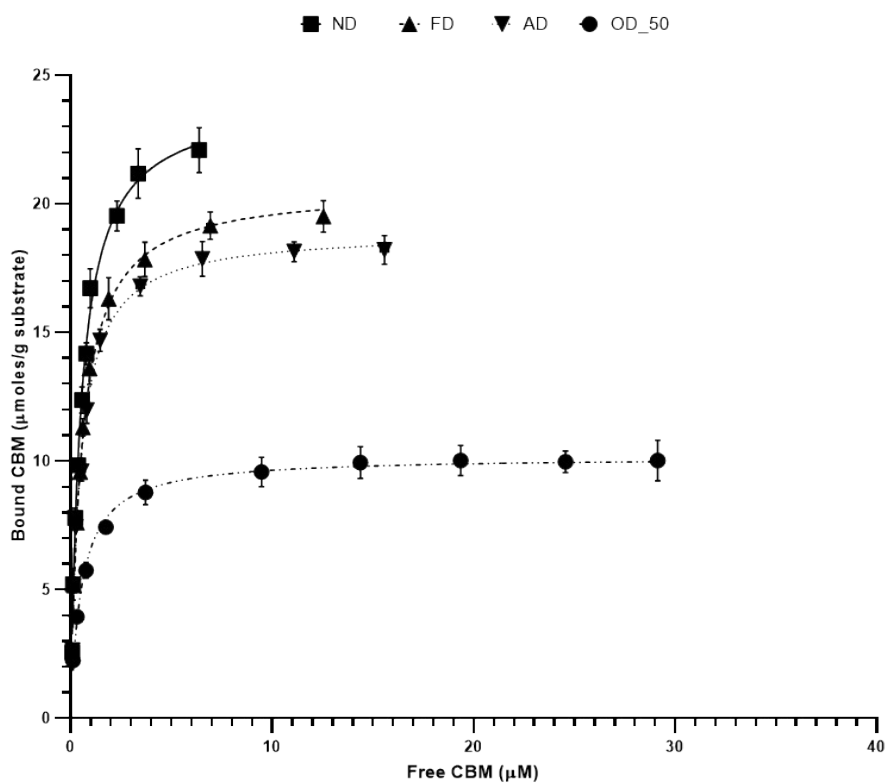

B

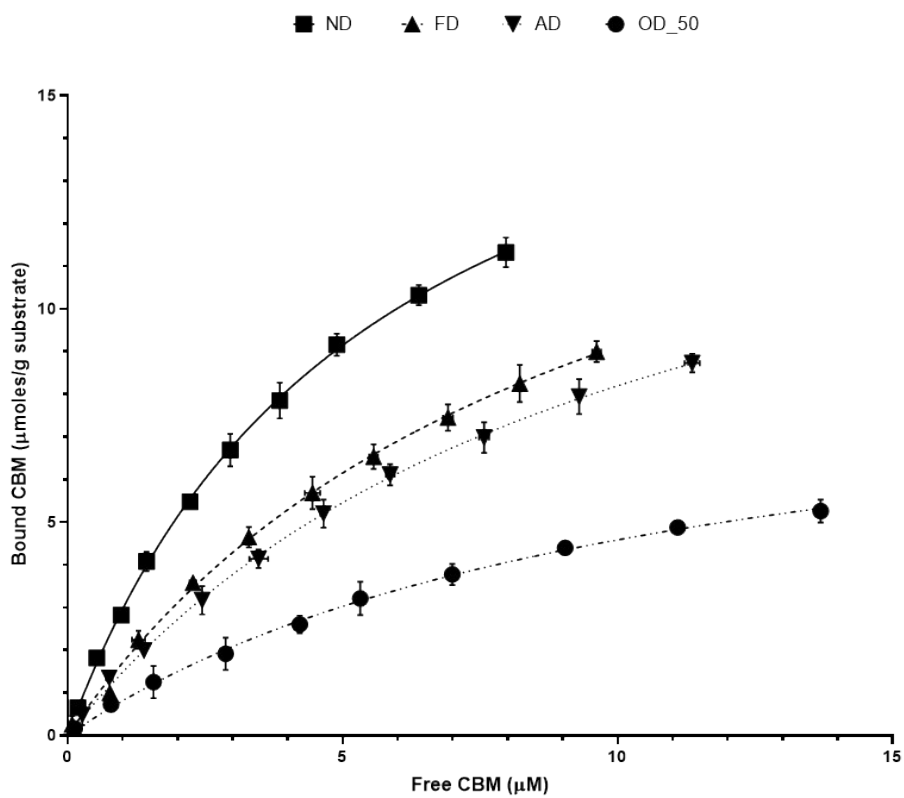

Supplementary Figure 1: Binding isotherm of GC3a (A) and CC17 (B) to never-dried (ND), freeze-dried (FD),

air-dried (AD), and oven-dried at 50°C (OD\_50) at 25°C in a 20 mM Tris-HCl (pH 7.5) buffer containing 20 mM NaCl, 5 mM CaCl<sub>2</sub>.
